# Supplementary material for: An electrochemical sensor for dopamine based on poly(o-phenylenediamine) functionalized with electrochemically reduced graphene oxide
Source: Royal Society of Chemistry journal article supplement (doi:10.1039/c3ra45234d), 2013-10-29
Supplement: c3ra45234d.pdf [file c3ra45234d.pdf]

# SUPPORTING INFORMATION

**An electrochemical sensor of dopamine based  
poly(*o*-phenylenediamine) functionalized the electrochemically  
reduced graphene oxide**

*Xuexia Liu,<sup>a,b</sup> Hui Zhu,<sup>a</sup> Xiurong Yang<sup>a,\*</sup>*

<sup>a</sup> State Key Laboratory of Electroanalytical Chemistry, Changchun Institute of Applied Chemistry, Chinese Academy of Sciences, Changchun, 130022, P. R. China

<sup>b</sup> Graduate School of the Chinese Academy of Sciences, Beijing, 100039, P. R. China

\* e-mail: xryang@ciac.jl.cn

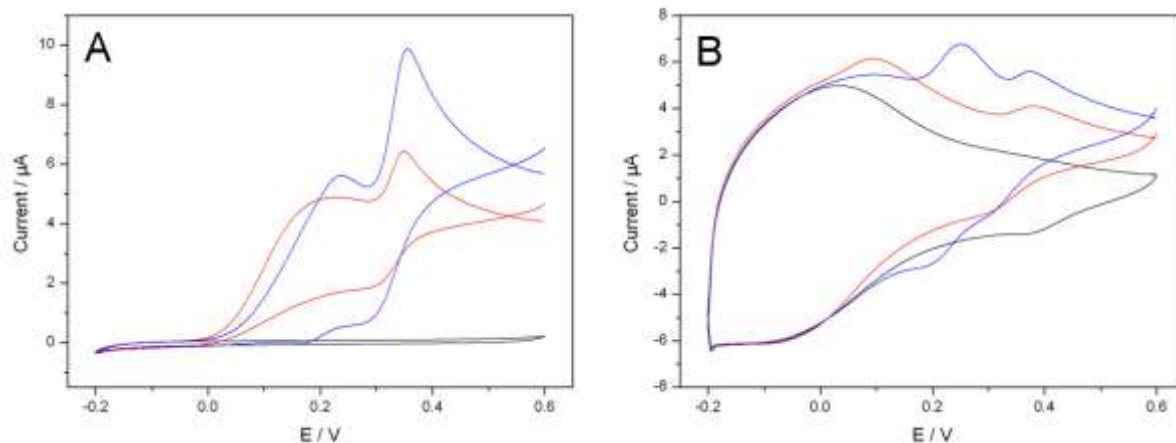

**Fig. S1.** Cyclic voltammograms of (A) bare GCE and (B) E-RGO modified GCE dipped in PBS (0.1 M, pH 7.1) at the scan rate of 50 mV/s: (black curve) in the absence of AA, UA and DA; (red curve): in the presence of 1 mM AA and 1 mM UA; (blue curve) in the presence of 1 mM AA, 1 mM UA and 100  $\mu$ M DA.

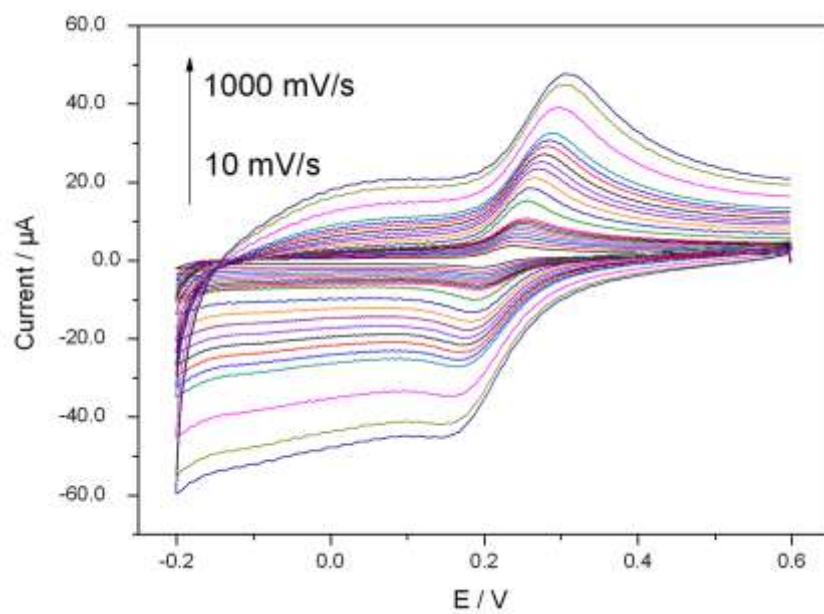

**Fig. S2.** Cyclic voltammograms of 300  $\mu\text{M}$  of DA at PoPD/E-RGO modified GCE in 0.1 M PBS (pH=7.1) at different scan rates.

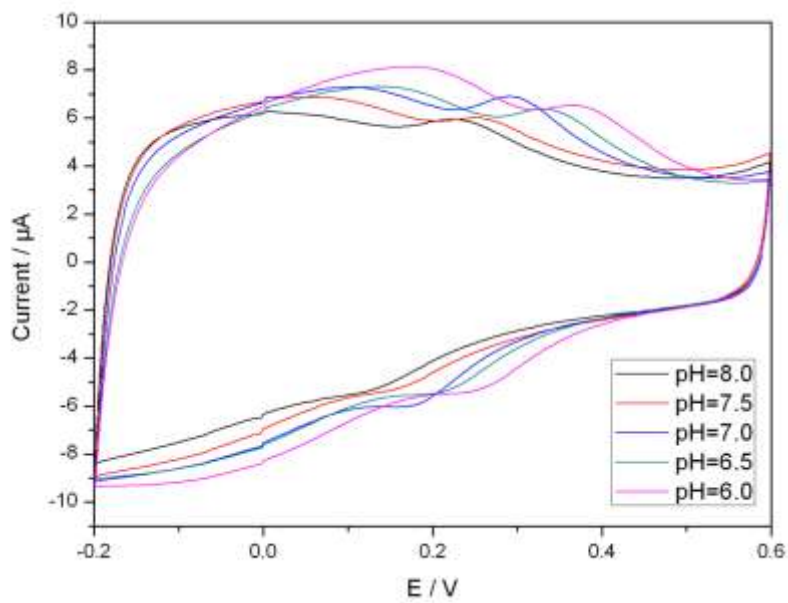

**Fig. S3.** Cyclic voltammograms of 0.1 mM DA on the P $\alpha$ PD/E-RGO modified GCE in 0.1M PBS at different pH values. Scan rate: 50 mV/s.

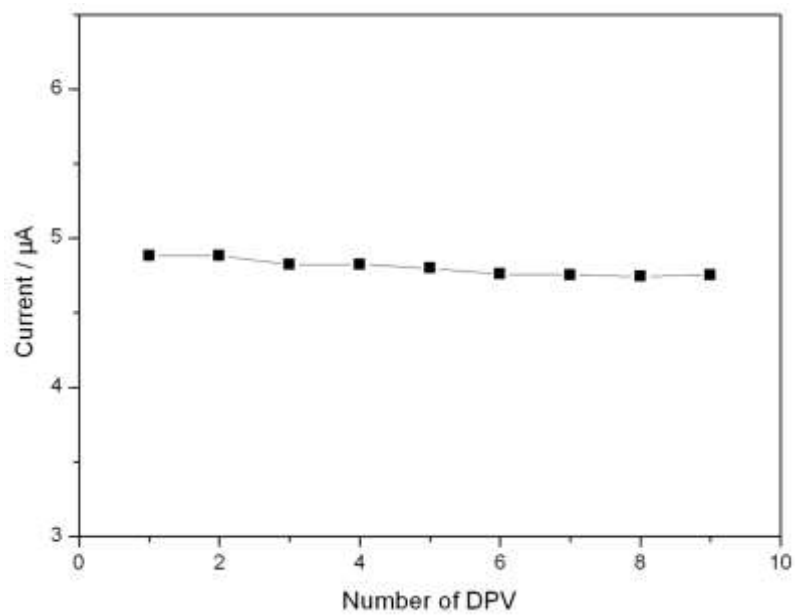

**Fig. S4.** The stability of PoPD/E-RGO modified GCE for 9 measurements.

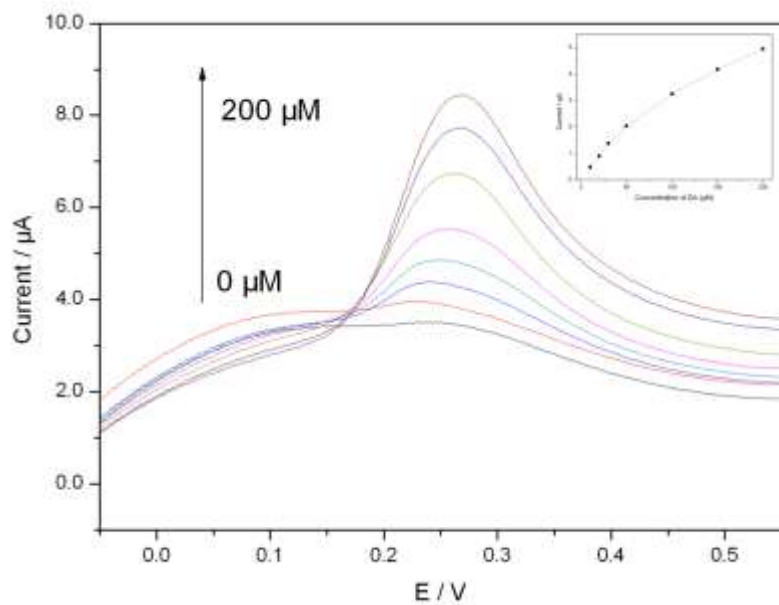

**Fig. S5.** DPV peak currents of different concentrations of DA in human urine sample. *Inset:* the calibration curve of DA.

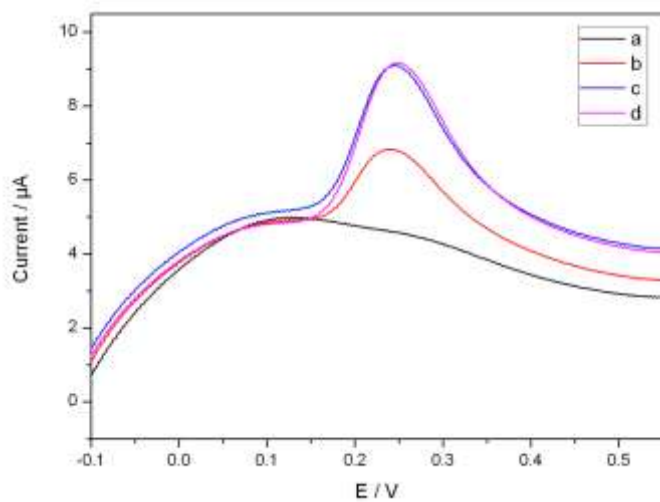

**Fig. S6.** DPV peak currents of different concentrations of DA in human urine sample: (curve a) 0  $\mu\text{M}$ , (curve b) 50  $\mu\text{M}$ , (curve c) 150  $\mu\text{M}$ , (curve d) added 40  $\mu\text{L}$  urine sample.
